# Supplementary material for: Analysis of Viral Promoters for Transgene Expression and of the Effect of 5′-UTRs on Alternative Translational Start Sites in Chlamydomonas
Source: MDPI journal article supplement (doi:10.3390/genes14040948), 2023-04-21
Supplement: s1 [file s1]

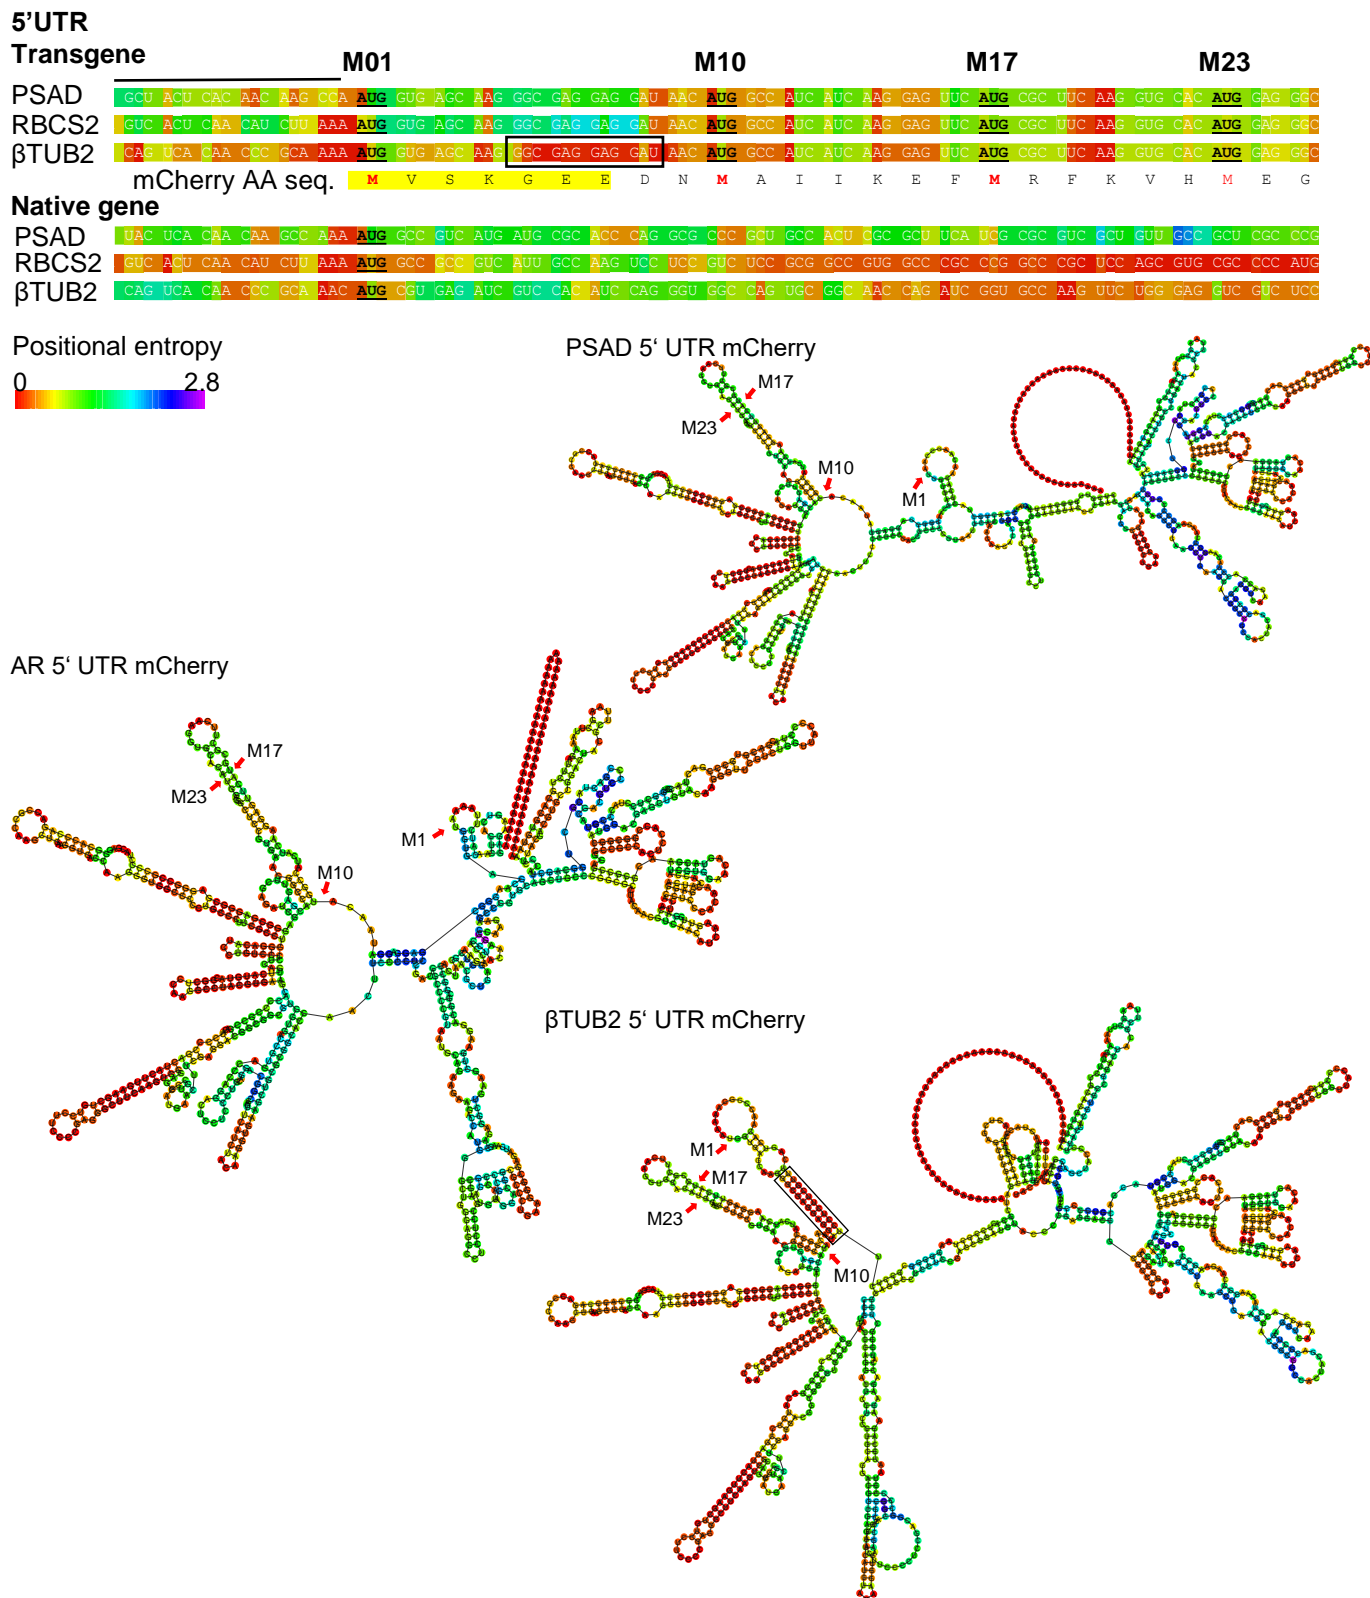

**Figure S1.** Prediction of mRNA secondary structures. Sequences of the transgenic *PSAD*-, *AR*-, and *A $\beta$ SAP(i)-mCherry(i)* reporter transcripts and the native *PSAD*, *RBCS2*, and  *$\beta$ TUB2* transcripts were analyzed by the RNAfold program of the Vienna RNA package. We added a 50-nt poly-A tail after each polyadenylation signal. Shown are the positional entropies calculated by RNAfold for each nucleotide in the regions comprising 5'-UTRs and AUG start codons of the six transcripts and secondary structure predictions for the three transgene transcripts. The black box indicates a region within the  *$\beta$ TUB2-mCherry* transcript for which RNAfold predicts a stem-loop formed by sequences preceding the M10 AUG in the *mCherry* reporter and the  *$\beta$ TUB2*-5'-UTR.
