# Supplementary material for: Analysis of Viral Promoters for Transgene Expression and of the Effect of 5′-UTRs on Alternative Translational Start Sites in Chlamydomonas
Source: MDPI journal article supplement (doi:10.3390/genes14040948), 2023-04-21
Supplement: s1 [file s1]

Promoter sequences. MoClo fusion sites are underlined.

Viral promoters:

*P<sub>AVCP1</sub>*

ggagGATGACGCTCTTGTGGAAGTCAGAGTACACAAACGAGTCCGGCACAAAGGATCCATAGTGCCCGTTACCCTCTTCTGTG  
CCAGACATAACCACGCCCCTGGGATATGCTTCTTGTGCCACAGAATATCTGTACCAGCGTGGTTTTGCGGGTTCCTCGCTT  
ACCAATAAACACACAGGTTTCGGTTGTCTCCTATAGTAGACGGGTCAAACCTTTTTTAGCTTCAGGCTCATGGTGATTGCGTGAG  
GATAGAGTGGTGAGCAAGAAGGCACTGCAGATGTCAGGCAAAGAGCGTTTACGTGATTCTGCTGTGCGCGGTCTGTGTGTCTG  
TCTGTATGTATAGTGAAGCAAAACAAAAATCCCAGCGCAGTTTTCTTGTCAATAGCGCGCACGTGTTTTCTATTTAAAGTT  
TGAATGGACGCTTAGGAAGAAAGAGTCGCACGTCTCGGGGGGAGGTAATCCCCGCCACGCAGCCAACACACaatg

*P<sub>AVCP2</sub>*

ggagCTGGCATTCCATAAGGGTTAGGGCACACGTGTCATTGTGAGTGACCCAGTGCAGATGGATGAAAGGAATCGTCATCATG  
TACAGCATCAGAAGGTGCTTGTTAGTGGCCCATGGTCCAGCAGAACGAACACGATAAGTACCAGGTGCAGCGCCGCTATGAG  
GGTTGCAGCATACAGCTGCTGCTTAACGTTTACCCTTGCTGGCTTTTCGTTGTTGTTATCCATGCCTTTTGTTCAGCTGGGG  
CGGGATAATCGTCAGATTGATGGTGTTAACGCTTTGTACCAGGTAGGTGGATGCGACGACCGAGCACGAGTGTTTAAAGAGTGC  
GCACATGATTTATAAGGAAGTGTACGCAACCCGAAGCGTAATGATTAAGGGTGAGAATGAGTAGTGCAGCTGTTGTGCCTGT  
GTATTCGTTTCAGTCACACAAAATATATTGGATTGCATACGATAGGAATCACTCATAAACAACTTCACAAACaatg

*P<sub>AVDPol</sub>*

ggagAAGCTAGACCACGTGGCGGGCCACTTCCTGGACGAGCACAAAGATCGACCTCGCCATCCCGGAGATGTTCCGGCTGTTCC  
AAGGAAGCGCTCGTGACCGGAGCAAGATTGCAGAGTACTGTGTGCGTGACACGGAGTTGCCGCTGAAGCTGCTGTCCAGGCTG  
GCCATCCTACCGAACATGCTGGAGATGGCAAAGGTGATGCACGTCCCCATTGAATACCTCATCCCGGAGGTCAACAGATCAA  
GGACTTCTATCAGTTTCTAAAGAAGTCCCAGCGAGCGTGGGTACCTTTGCCCTGGACCTAAACTCAAACCGAAATGTAAATAT  
GTTACACGTAACAACGTTGGATAGATAGCTGGTCGTTGATTCATTTTGATGAATTGATACATCGAATGTTCAAGAGGGTGATG  
CGATAATGACTTAAAGACAGGGCACCTTTCAGGGTCTTAAAGACCTGACTCAGGTGGATAAACTGTGACCGCTGCACGACAGA  
GGAATTGAGCTGCAATATTAACAaatg

*P<sub>IVCP1</sub>*

ggagTCCGCAGCGGCATGGGCCTGCGCATCAGGTGGTGGCAGCGCCACTATCGGCACCGACTCTGCCACCTCAGGAGCTGCGT  
CAGCCACCACCAGCGACGCAGGTGcCTTCTTCCGGGTGGCTGTGACCTTCTTCGGGGCCGACGCTCTGGGGTCTGTGCTTTT  
GTGGCGCCAGCCTTGCTTGTGTTGGCTCTGGGGCGTTTGGGCGCTACAGCAGCGGGCCTGCAGGCCCTGCAGCAGCGGCAGA  
TGAGGCATCATCATCCTCAGTGGGTGCGGGTGCGGCAGCCTTGGTGGCCTTCGACACGCCCCCAGGAGCGCGCGGATGGCCA  
TACTGTACTGACGGTGACTAGAATGGTGCGCGCGGGGTATCAAGATGCACCACCAGGTGGTGCAGAGCCTTAAGCTCTTTGAAA  
GGGGCACTCCGTGTCTCGAACCTGCGCGACTGTCTGTGGCGCCCAACCTGTTGAAGAGGCTTGTGGAGTGGCACACAGTAT  
CAAGCaatg

*P<sub>IVCP2</sub>*

ggagCTGCACTACATTGCGGATGTGGTGCCTGCCGATCGCCGTGAATCTGTGATGAACAAGGTTCAGGGAGTTGCAGATAATTG  
AGGAGCAGCTGCAGCTGCAGGCCTCGTATGTAGAGaGTCTCGGAATGTCGGTTTCAAATGTAACCTGGCACGACAACAAGGTG  
TCCGTCGACGTGTCTTTGACAAGATTGACTTCAAGAAGTTGGAAGCCCTGATCAAGACAGGCAGCAGGCCAAGCACCGTGTT  
TGAAATGCAGCTGGAAGCCCTGAATGGCACACTCAGCAGTCTCACCGACATTGCGGGTGACACGTACTTGGAGGGCGACGCGG  
TGGTGTACAGCGTGGAGGGCACAGACCCTGACGACCAGACACGTACGAGCTCGTGTTTGCTGACATCACCATTTCTTACACC  
CAAAGCTACTGAAAAATCAGGGACGAATGAAGCTGCGTCTGCTCAAATCTTTTTTCTCAAGTTAGACCATAGTCAGAGGAG  
CAAAAaatg

*P<sub>IVRPol</sub>*

ggagCGTTTCGAGTCTGTTCTGCCTCCACACCCATGAGCCTCCCCACTGGGGACGTGAGGCTGGGATCCGTCACGGTGGAGAA  
CTTGAGAGCGCTTCCGCGACGAGGAGGTGAGGTACATCTCAACGCGCAGTCACCCGAGGGTGGCCCCCAATGGCTGTGCAGC  
TCACATCCCAGCAGCGCCCTGAGAAGCCCCAGGGCAGTCTTCGAGAAAATGGTGACAGGATCGCGACACCTGCGGTGATGG  
CGTATTGCCGACCCCTACCTTTCTTTCGGGCAATGATTGCGCGCTTTCGGCGGAAGTAGGTTCCCCGCTCCAGCACACGACG  
GCCACGCGCTGGCTATTAGGATCACCATGTCTGCGGGCAGCATGGTGTTGCTGTACTGAGATGCCCTGTTCTTTGGGTCTGG  
CTCTCGCCGCGAAAAAGACATAAGGGCTCGGTGGGCCAGTACTTGGTAGGACACCCGGCCTCAATCGGCAGGGAATTTAGCGC  
GCAACaatg

## Benchmark promoters:

### $P_{PSAD}$

PSAD Promoter, PSAD 5'UTR

ggagCACACACCTGCCGTCTGCCTGACAGGAAGTGAACGCATGTCGAGGGAGGCCTCACCAATCGTCACACGAGCCCTCGTC  
AGAAACACGTCTCCGCCACGCTCTCCCTCTCACGGCCGACCCCGCAGCCCTTTTGCCCTTTCCTAGGCCACCGACAGGACCCA  
GGCGCTCTCAGCATGCCTCAACAACCCGTA CTCTGCGCAGCGGTGCCCTTGTGCTGGTGATCGCTTGGAAAGCGCATGCGATGA  
CGAAGGGGCGGAGCAGGCGGCCTGGCTGTTTGAAGGGCTCGCCGCCAGTTCGGGTGCCTTCTCCACGCGCGCCTCCACACCT  
ACCGATGCGTGAAGGCAGGCAAATGCTCATGTTTGCCCGAACTCGGAGTCCTTAAAAAGCCGCTTCTTGTGCTCGTTCGAGAG  
CATGTTAGCAGATCGCAGTGCCACCTTTCCTGACGCGCTCGGCCCATATTCGGACGCAATTGTCATTTGTAGCACAAATTGGA  
GCAAATCTGGCGAGGCAGTAGGCTTTTAAGTTGCAAGGCGAGAGAGCAAAGTGGGACGCGGCGTGATTATTGGTATTTACGCG  
ACGGCCCGGCGCGTTAGCGGCCCTTCCCCAGGCCAGGGACGATTATGTATCAATATTGTTGCGTTCGGGCACTCGTGCGAGG  
GCTCCTGCGGGCTGGGGAGGGGGATCTGGGAATTGGAGGTACGACCGAGATGGCTTGCTCGGGGGGAGGTTTCTCGCCGAGC  
AAGCCAGGGTTAGGTGTTGCGCTCTTGACTCGTTGTGCATTCTAGGACCCCACTGCTACTCACAACAAGCCaatg

### $P_{AR}$

HSP70A Promoter, RBCS2 Promoter, RBCS2 5'UTR

ggagGAAGGGCCGCGACGGTTTCGAGAACCGACTTGAGGGCGCCAAACGAGCCCGAGCCGCCGTTGCGCCAGGCGAAACCAGAA  
CCGTAGATTAATGCACTTGAGCTATTCATTGGAGCGATCTGCCGGGGACAGCGGGTCTGGCGTGCGCGGATTGGAGATCGCA  
AATTACATATGTCTGCGTGACGGCGGGGAGCTCGCTGAGGCTTGACATGATTGGTGCGTATGTTTGTATGAAGCTACAGGACT  
GATTTGGCGGGCTATGAGGGCGGGGAAGCTCTGGAAGGGCCGCGATGGGGCGCGGGCGTCCAGAAGGCGCCATACGGCCCG  
CTGGCGGCACCCATCCGGTATAAAAGCCCGCGACCCCGAACGGTGACCTCCACTTTCAGCGACAAACGAGCACTTATACATAC  
GCGACTATTCTGCCGTATACATAACCACTCAGCTAGCGATCCCGGGCGCGCCAGAAGGAGCGCAGCCAAACCAGGATGATGT  
TTGATGGGGTATTTGAGCACTTGCAACCCCTATCCGGAAGCCCCCTGGCCCCACAAAGGCTAGGCGCCAATGCAAGCAGTTTCG  
ATGCAGCCCCCTGGAGCGGTGCCCTCCTGATAAACCGGCCAGGGGGCTATGTTCTTTACTTTTTTACAAGAGAAGTCACTCAA  
CATCTTAAaatg

### $P_{\beta SAP(i)}$

HSP70A Promoter,  $\beta$ TUB2 Promoter,  $\beta$ TUB2 5' UTR, RBCS2i1, engineered ATANTT motifs  
are underlined

ggagGCTGAGGCTTGACATGATTGGTGCGTATGTTTGTATGAAGCTACAGGACTGATTTGGCGGGCTATGAGGGCGGGGGAAG  
CTCTGGAAGGGCCGCGATGGGGCGCGGGCGTCCAGAAGGCGCCATACGGCCCGCTGGCGGCACCCATCCGGTATAAAAGCCC  
GCGACCCCGAACGGTGACCTCCACTTTCAGCGACAAACGAGCACTTATACATACGCGACTATTCTGCCGCTATACATAACCAC  
TCAGCTAGCTTAAGATCCCATCACCGGTCTGGCACTTCTTTCGCTATGACACTTCAGCAAAAGGTAGGGCGGGCTGCGAGA  
CGGCTTCCCGGGCGCTGCATGCAACACCGATGATACTTATGCTTCGACCCCCCGAAGCTCCTTCGGGGCTGCATGGGCGCTCCG  
ATGCCGCTCCAGGGCGAGCGCTGTTTAAATAGCCAGGCCCGGACTGCAAGACATTATAGCGAGCTACCAAGCCATACTTC  
AAACACCTAGATCACTACCACTTCTACACAGGCCACTCGAGCTTGTGGTGAGTCGACGAGCAAGCCCGGCGGATCAGGCAGCG  
TGCTTGCAAGATTTGACTTGCAACGCCCGCATTGTGTGACGAAGGCTTTGGCTCCTCTGTGCTGTCTCAAGCAGCATCTAA  
CCCTGCGTGCCTGTTCCATTTGCAGATCGCACTCCGCTAAGGGGGCGCCTCTTCCTCTTCGTTTCAGTCACAACCCGCAaatg
